# Supplementary material
Source: PubMed Central journal article supplement (PMC516567)

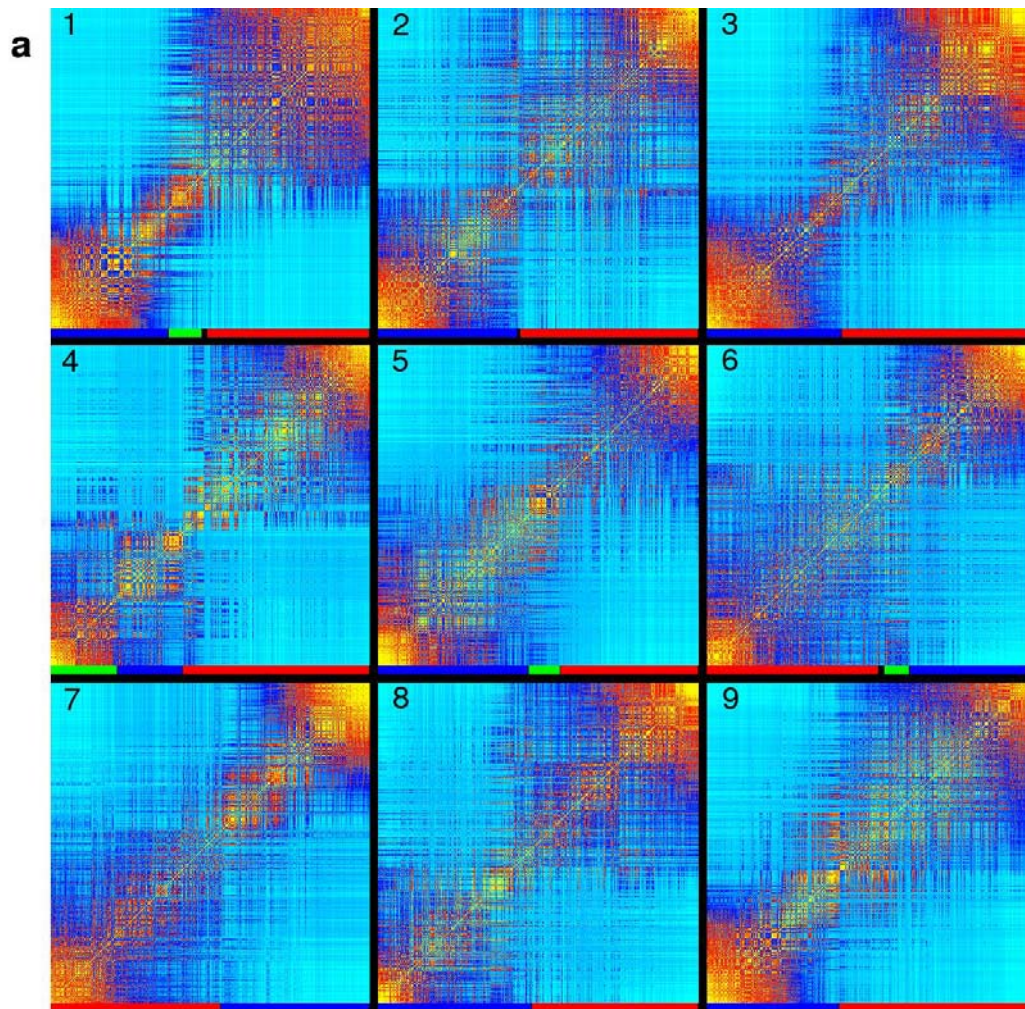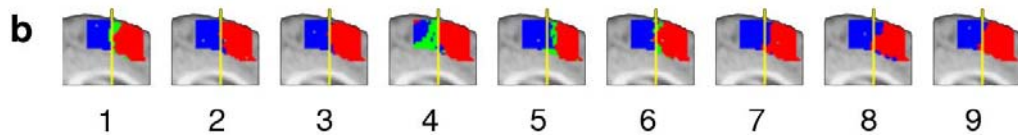

Supplement: pnas_101_36_13335__2.pdf [file pnas_101_36_13335__2.pdf]

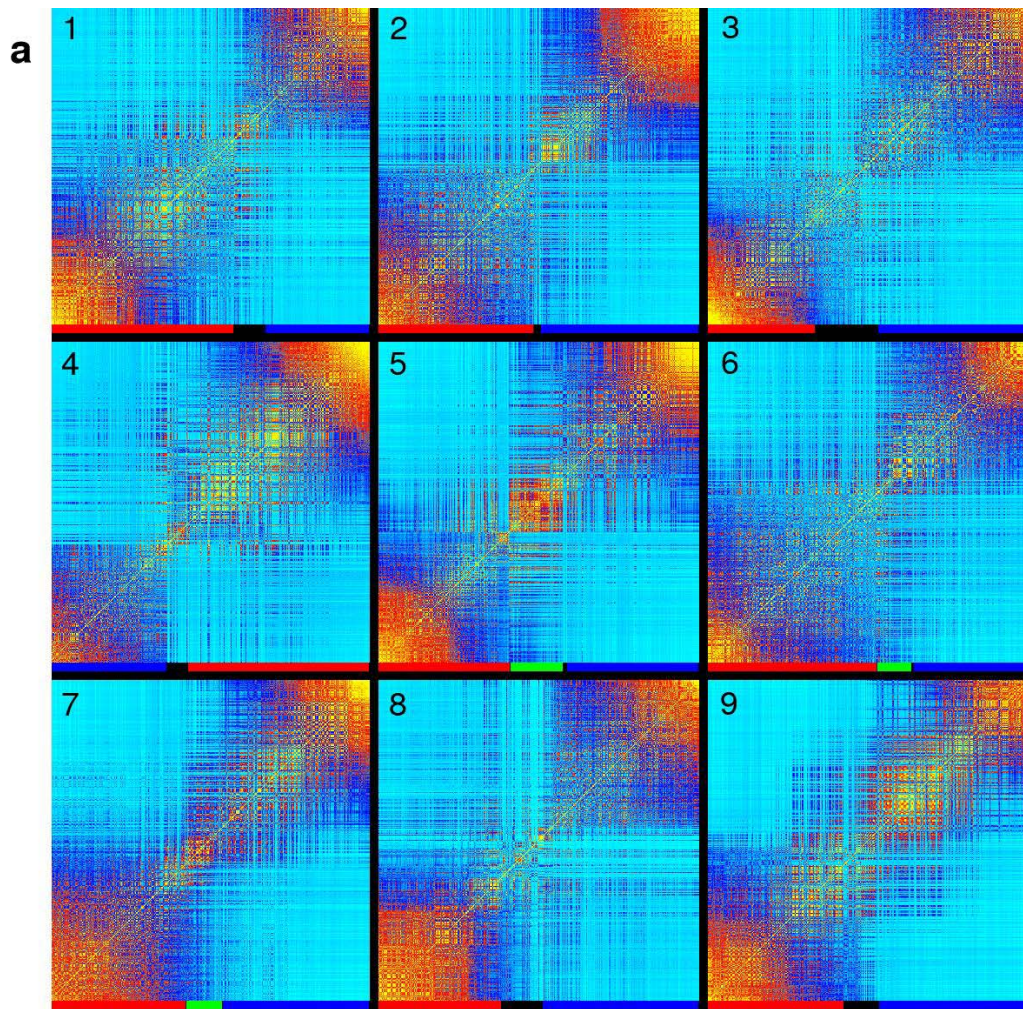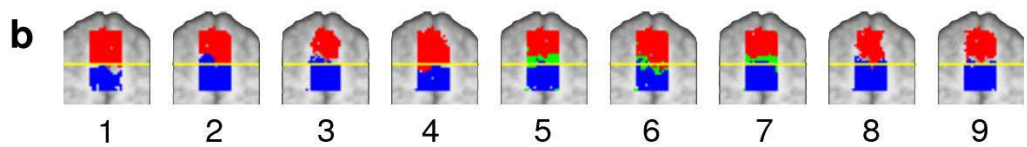

Supplement: pnas_101_36_13335__3.pdf [file pnas_101_36_13335__3.pdf]

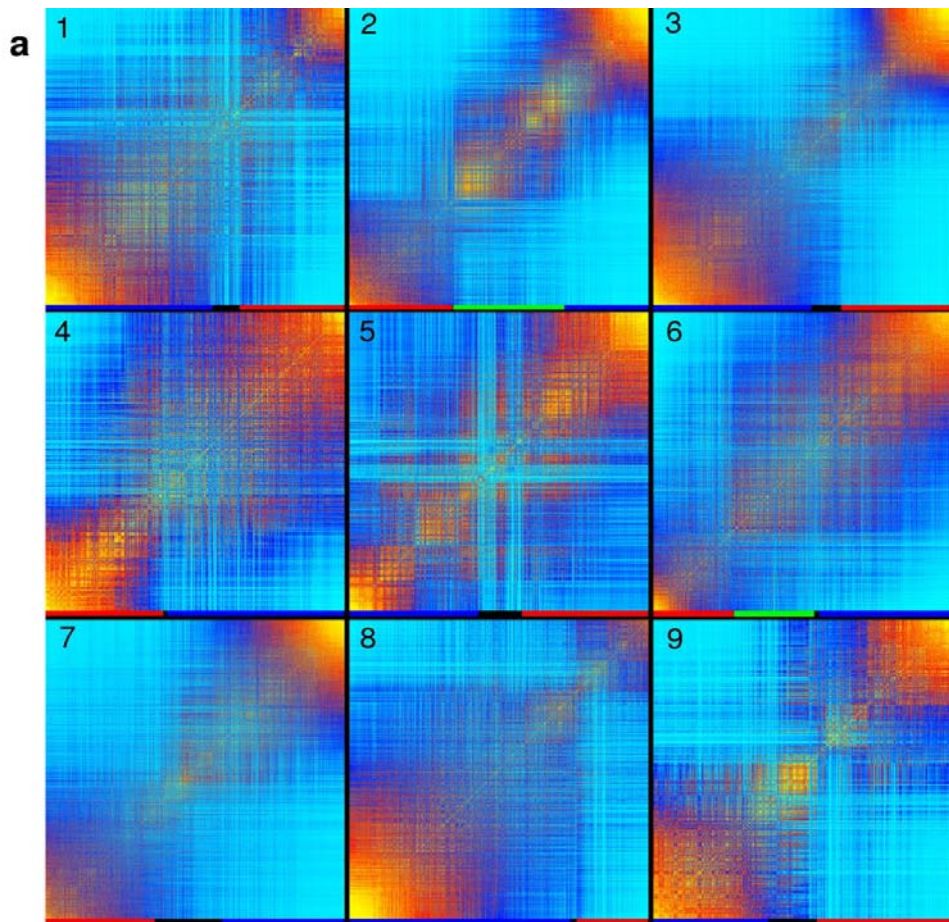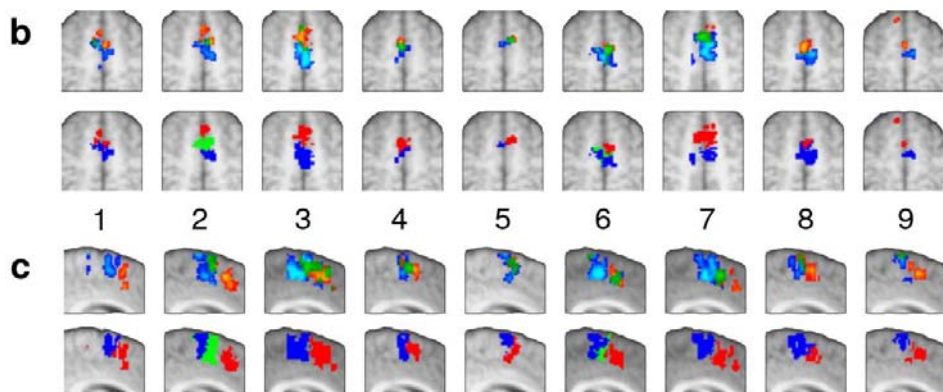

Supplement: pnas_101_36_13335__4.pdf [file pnas_101_36_13335__4.pdf]
